# Supplementary material
Source: Research Square preprint supplement (doi:10.21203/rs.3.rs-9647411/v1)
Supplement: Supplementary file 1 [file 4c5bb72e8f46b043509fa444.docx]

**Table S1.** Correlation between SOX17 expression and ER, PR, and p16 status in endocervical adenocarcinoma (ECA)

| **Biomarker** | **Total, *n*** | **Total positive, *n* (%)** | **Low positive, *n* (%)** | **Intermediate positive, *n* (%)** | **High positive, *n* (%)** | **Negative, *n* (%)** | ***p* value** |
| --- | --- | --- | --- | --- | --- | --- | --- |
| ER＋ | 27 | 17 (63) | 2 (7) | 4 (15) | 11 (41) | 10 (37) | **< 0.001** |
| ER– | 136 | 29 (21) | 9 (7) | 7 (5) | 13 (9) | 107 (79) |
| PR＋ | 6 | 5 (83) | 0 (0) | 0 (0) | 5 (83) | 1 (17) | **0.009** |
| PR– | 157 | 41 (26) | 11 (7) | 11 (7) | 19 (12) | 116 (74) |
| p16＋ | 124 | 34 (27) | 9 (7) | 8 (6) | 17 (14) | 90 (73) | 0.685 |
| p16– | 39 | 12 (31) | 2 (5) | 3 (8) | 7 (18) | 27 (69) |

Note: *p* values were calculated by the Chi-square or Fisher’s exact test for comparisons of SOX17 expression levels between biomarker-positive and -negative subgroups (ER, PR, p16) in ECA.

Abbreviations: ECA, endocervical adenocarcinoma; ER, estrogen receptor; PR, progesterone receptor; +, positive; -, negative.

**Table S2.** Correlation between SOX17 expression and ER, PR, p16 status in endometrial carcinoma (EC) subtypes

| **Biomarker status** | **EEC, *n* (%)** | **SC, *n* (%)** | **CCC, *n* (%)** | **CS, *n* (%)** | **ECs, *n* (%)** | ***p* value** | | | | |
| --- | --- | --- | --- | --- | --- | --- | --- | --- | --- | --- |
| EEC | SC | CCC | CS | ECs |
| ER＋ | 180 (100) | 19 (100) | 9 (90) | 3 (43) | 211 (98) | - | **0.020** | 1.000 | 0.068 | **< 0.001** |
| ER– | 5 (100) | 11 (85) | 8 (89) | 2 (25) | 27 (69) |
| PR＋ | 173 (100) | 11 (100) | 5 (100) | 2 (40) | 191 (98) | - | 0.272 | 1.000 | 0.100 | **< 0.001** |
| PR– | 12 (100) | 19 (90) | 12 (86) | 3 (30) | 47 (77) |
| p16＋ | 78 (100) | 21 (91) | 8 (80) | 4 (44) | 111 (93) | - | 0.100 | 0.474 | 0.580 | 0.615 |
| p16– | 107 (100) | 9 (100) | 9 (100) | 1 (17) | 127 (94) |

Note: *p* values were calculated by the Chi-square or Fisher’s exact test for comparisons of SOX17 expression between biomarker subgroups within each EC subtype.

Abbreviations: EC, endometrial carcinoma; EEC, endometrioid endometrial carcinoma; SC, serous carcinoma; CCC, clear cell carcinoma; CS, carcinosarcoma.

**Table S3.** Correlation between SOX17 expression and ER, PR, and p16 status in SOX17-positive and -negative subgroups of ECA and EC

| **Biomarker status** | **SOX17+ ECAs, n (%)** | **SOX17+ ECs, n (%)** | **SOX17– ECs, n (%)** | **SOX17– ECAs, n (%)** | ***p* value** |
| --- | --- | --- | --- | --- | --- |
| ER+ | 17/46 (37) | 211/238 (89) | 5/17 (29) | 10/117 (9) | **< 0.001** 1; **0.024** 2 |
| ER– | 29/46 (63) | 27/238 (11) | 12/17 (71) | 107/117 (91) |
| PR+ | 5/46 (11) | 191/238 (80) | 3/17 (18) | 1/117 (1) | **< 0.001** 1; **0.006** 2 |
| PR– | 41/46 (89) | 47/238 (20) | 14/17 (82) | 116/117 (99) |
| p16+ | 34/46 (74) | 111/238 (47) | 9/17 (53) | 90/117 (77) | **0.001** 1; **0.072** 2 |
| p16– | 12/46 (26) | 127/238 (53) | 8/17 (47) | 27/117 (23) |

Note: p values were calculated by the Chi-square or Fisher’s exact test. ¹ Comparison between SOX17+ ECA and SOX17+ EC; ² Comparison between SOX17– EC and SOX17– ECA.
